# Supplementary material for: Quality Improvement of Zao Pepper by Inoculation with Lactobacillus plantarum 5-1: Probiotic Ability and Fermentation Characteristics of Lactic Acid Bacteria
Source: MDPI journal article supplement (doi:10.3390/fermentation9060547), 2023-06-06
Supplement: s1 [file s1]

## Supplementary Materials

**Table S1.** Primers for resistance genes

| Gene                    | Primers (5'-3')                                                                                        | Amplicon size (bp) | Temp . (°C) |
|-------------------------|--------------------------------------------------------------------------------------------------------|--------------------|-------------|
| <i>blaZ</i>             | <i>blaZ</i> -F: ACTTCAACACCTGCTGCTTTC<br><i>blaZ</i> -R: TAGGTTTCAGATTGGCCCTTAG                        | 240                | 58          |
| <i>mecA</i>             | <i>mecA</i> -F: GGGATCATAGCGTCATTATTC<br><i>mecA</i> -R: AGTTCTGCAGTACCGGATTTGC                        |                    |             |
| <i>aph(3'')-III</i>     | <i>aph(3'')-III</i> -F: GCCGATGTGGATTGCGAAAA<br><i>aph(3'')-III</i> -R: GCTTGATCCCCAGTAAGTCA           | 292                | 52          |
| <i>ant(2'')-I</i>       | <i>ant(2'')-I</i> -F: GGGCGCGTCATGGAGGAGTT<br><i>ant(2'')-I</i> -R: TATCGCGACCTGAAAGCGGC               |                    |             |
| <i>aph(3'')-I</i>       | <i>aph(3'')-I</i> -F: AACGTCTTGCTCGAGGCCGCG<br><i>aph(3'')-I</i> -R: GGCAAGATCCTGGTATCGGTCTGCG         | 670                | 68          |
| <i>aac(6')-aph(2'')</i> | <i>aac(6')-aph(2'')</i> -F: CCAAGAGCAATAAGGGCATA<br><i>aac(6')-aph(2'')</i> -R: CACTATCATAACCACTACCG   |                    |             |
| <i>aph(3')-IIIa</i>     | <i>aph(3')-IIIa</i> -F: GCCGATGTGGATTGCGAAAA<br><i>aph(3')-IIIa</i> -R: GCTTGATCCCCAGTAAGTCA           | 220                | 55          |
| <i>str</i>              | <i>str</i> -F: ATGGAATTATTTCCACCTGA<br><i>str</i> -R: TCAAAACCCCTATTAAAGCC                             |                    |             |
| <i>ant(6)-Ia</i>        | <i>ant(6)-Ia</i> -F: ACTGGCTTAATCAATTTGGG<br><i>ant(6)-Ia</i> -R: GCCTTTCCGCCACCTCACCG                 | 386                | 50          |
| <i>tet(W)</i>           | <i>tet(W)</i> -F: GAGAGCCTGCTATATGCCAGC<br><i>tet(W)</i> -R: GGGCGTATCCACAATGTTAAC                     |                    |             |
| <i>tet(M)</i>           | <i>tet(M)</i> -F: GTTAAATAGTGTCTTGGAG<br><i>tet(M)</i> -R: CTAAGATATGGC TCTAACAA                       | 168                | 53          |
| <i>catA</i>             | <i>catA</i> -F: GGATATGAAATTTATCCCTC<br><i>catA</i> -R: CAATCATCTACCCTATGAAT                           |                    |             |
| <i>lnu(A)</i>           | <i>lnu(A)</i> -F: GGTGGCTGGGGGGTAGATGTATTAAGTGG<br><i>lnu(A)</i> -R: GCTTCTTTTGAAATACATGGTATTTTTTCGATC | 323                | 55          |
| <i>lnu(B)</i>           | <i>lnu(B)</i> -F: CCTACCTATTGTTTGTGGAA<br><i>lnu(B)</i> -R: ATAACGTTACTCTCCTATTTTC                     |                    |             |
| <i>erm(B)</i>           | <i>erm(B)</i> -F: GAAAAGGTACTCAACCAAATA<br><i>erm(B)</i> -R: AGTAACGGTACTTAAATTGTTTAC                  | 639                | 54          |
| <i>erm(C)</i>           | <i>erm(C)</i> -F: TCAAAACATAATATAGATAAAA<br><i>erm(C)</i> -R: GCTAATATTGTTTAAATCGTCAAT                 |                    |             |
| <i>vanX</i>             | <i>vanX</i> -F: TCGCGGTAGTCCCACCATTCGTT<br><i>vanX</i> -R: AAATCATCGTTGACCTGCGTTAT                     | 454                | 55          |
| <i>vanA</i>             | <i>vanA</i> -F: TCTGCAATAGAGATAGCCGC<br><i>vanA</i> -R: GGAGTAGCTATCCCAGCATT                           |                    |             |
| <i>rpoB</i>             | <i>rpoB</i> -F: TAACCGTGGTGCTTGGCTDGAATWYGAAAC<br><i>rpoB</i> -R: ATCAAACCAATGTTAGGNCCTTCWGGDGTTC      | 1100               | 59          |

**Table S2.** Identification results of lactic acid bacteria (LAB)

| Strain Number | Identification results            |
|---------------|-----------------------------------|
| 2-1           | <i>Lactobacillus plantarum</i>    |
| 5-1           | <i>Lactobacillus plantarum</i>    |
| 8-1           | <i>Lactobacillus plantarum</i>    |
| 16-1          | <i>Lactobacillus plantarum</i>    |
| 21-1          | <i>Lactobacillus plantarum</i>    |
| 24-1          | <i>Lactobacillus plantarum</i>    |
| 27-1          | <i>Lactobacillus plantarum</i>    |
| 33-3          | <i>Lactobacillus plantarum</i>    |
| 3-2           | <i>Lactobacillus alimentarius</i> |
| 7-4           | <i>Lactobacillus alimentarius</i> |
| 10-1          | <i>Lactobacillus alimentarius</i> |
| 13-4          | <i>Lactobacillus alimentarius</i> |
| 19-2          | <i>Lactobacillus alimentarius</i> |
| 25-1          | <i>Lactobacillus alimentarius</i> |
| 28-1          | <i>Lactobacillus alimentarius</i> |
| 29-1          | <i>Lactobacillus alimentarius</i> |
| 7-2           | <i>Lactobacillus pentosus</i>     |
| 16-4          | <i>Lactobacillus pentosus</i>     |
| 19-1          | <i>Lactobacillus pentosus</i>     |
| 21-3          | <i>Lactobacillus pentosus</i>     |
| 9-3           | <i>Lactobacillus pentosus</i>     |
| 5-4           | <i>Lactobacillus hilgardii</i>    |
| 9-1           | <i>Lactobacillus namurensis</i>   |
| 21-4          | <i>Lactobacillus harbinensis</i>  |
| 21-5          | <i>Pediococcus ethanolidurans</i> |
| 17-1          | <i>Weissella hellenica</i>        |

**Table S3.** Sensory evaluation score of Zao pepper with different LAB

| Strain                        | Sense |          |       |           |       |
|-------------------------------|-------|----------|-------|-----------|-------|
|                               | Spicy | Sourness | Color | Crispness | Smell |
| <i>L. plantarum</i> 5-1       | 5     | 5        | 4     | 5         | 5     |
| <i>L. plantarum</i> 21-1      | 4     | 4        | 5     | 5         | 5     |
| <i>L. plantarum</i> 2-1       | 4     | 4        | 5     | 5         | 4     |
| <i>L. alimentarius</i> 19-2   | 4     | 4        | 4     | 3         | 4     |
| <i>L. alimentarius</i> 10-1   | 4     | 5        | 3     | 2         | 4     |
| <i>L. alimentarius</i> 13-4   | 3     | 3        | 4     | 3         | 4     |
| <i>L. hilgardii</i> 5-4       | 3     | 4        | 4     | 3         | 3     |
| <i>L. pentosus</i> 7-2        | 4     | 4        | 3     | 3         | 3     |
| <i>L. plantarum</i> 27-1      | 3     | 3        | 4     | 3         | 3     |
| <i>L. alimentarius</i> 28-1   | 3     | 3        | 4     | 3         | 3     |
| <i>L. alimentarius</i> 7-4    | 4     | 3        | 3     | 2         | 4     |
| <i>L. plantarum</i> 33-3      | 4     | 3        | 3     | 2         | 3     |
| <i>P. ethanolidurans</i> 21-5 | 4     | 3        | 4     | 1         | 3     |
| <i>L. plantarum</i> 16-1      | 4     | 3        | 3     | 1         | 3     |
| <i>L. alimentarius</i> 25-1   | 3     | 3        | 3     | 1         | 3     |
| <i>L. pentosus</i> 19-1       | 4     | 3        | 3     | 2         | 1     |
| <i>L. pentosus</i> 16-4       | 3     | 3        | 3     | 2         | 1     |
| <i>L. harbinensis</i> 21-4    | 3     | 3        | 3     | 1         | 2     |
| <i>L. plantarum</i> 8-1       | 1     | 2        | 4     | 1         | 2     |
| <i>L. plantarum</i> 24-1      | 1     | 2        | 4     | 1         | 2     |
| <i>L. namurensis</i> 9-1      | 3     | 3        | 2     | 1         | 1     |
| <i>W. hellenica</i> 17-1      | 3     | 2        | 1     | 3         | 1     |
| <i>L. alimentarius</i> 3-2    | 2     | 1        | 3     | 2         | 1     |
| <i>L. pentosus</i> 21-3       | 1     | 2        | 4     | 1         | 1     |
| <i>L. alimentarius</i> 29-1   | 1     | 1        | 1     | 1         | 1     |
| <i>L. paracasei</i> 9-3       | 1     | 1        | 1     | 1         | 1     |

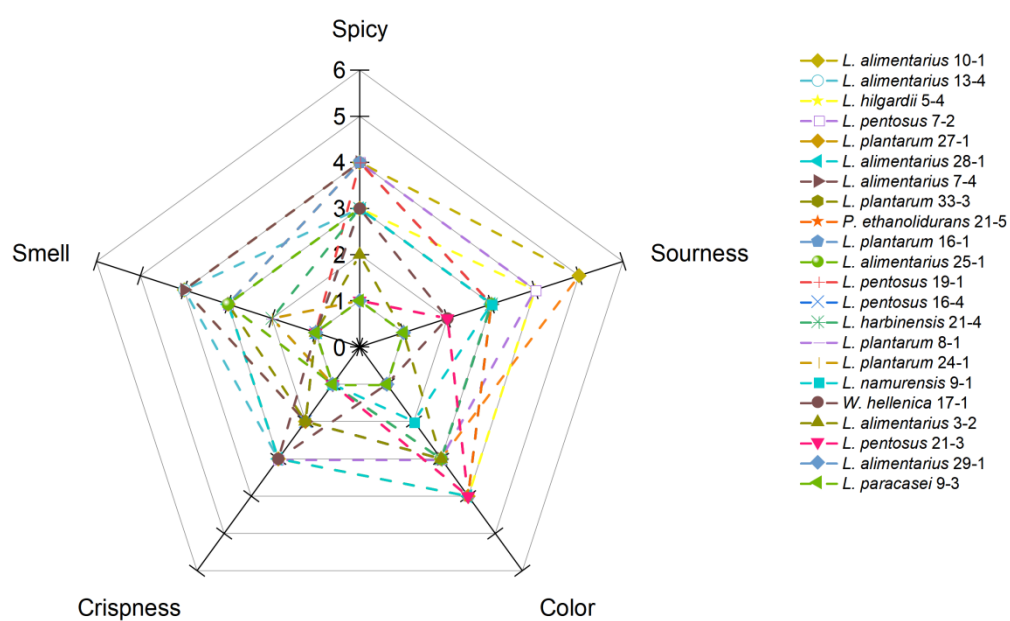

**Figure S1.** Comparing radar charts for sensory evaluation data of 22 LAB from Zao pepper. Each Zao pepper samples fermented for 30 days.

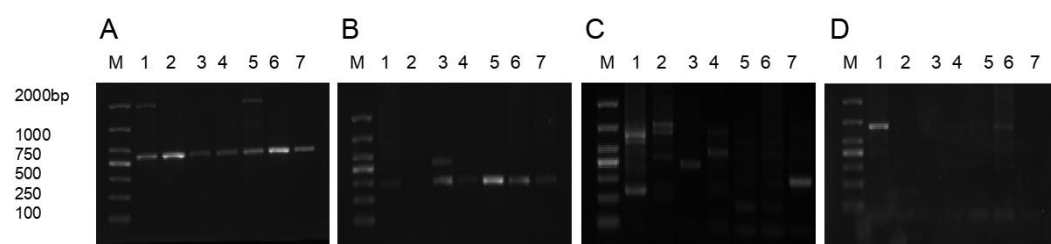

**Figure S2.** Validation of the resistance gene . The picture shows the PCR amplification results, **(A)** *vanX* (454 bp); **(B)** *aph3'''III* (292 bp); **(C)** *ant 6-Ia* (386 bp); **(D)** *aph3'''I* (670 bp).  
M: Marker DL 2000; lane 1: *L. plantarum* 2-1; lane 2: *L. plantarum* 5-1; lane 3: *L. alimentarius* 19-2;  
lane 4: *L. plantarum* 21-1; lane 5: *L. brevis* CICC 24450; lane 6: *L. brevis* CICC 6239; lane 7: *L. fructivorans* CGMCC 1.2427.
